# 1 **The Value of a Regional ‘Living’ COVID-19 Registry and the Challenges of Keeping It** 2 **Alive**

3 John Hanna MD, Tara Chen MD, Carlos Portales-Castillo MD, Donna Newhart MS, Katherine  
4 Schantz MPA, Kathleen Rozzi CCS-P, Jonathan Bress MD, Emil Lesho DO

5 Rochester Regional Health, Rochester, NY, 14621, USA

## 6 **Abstract**

7 **Background:** The need for rapid access to regularly updated patient data for hypothesis testing,  
8 surge planning, and epidemiologic investigations underscore the value of updated registries that  
9 clinicians, researchers, and policy makers can easily access for local and regional planning. We  
10 sought to create an adaptive, living registry containing detailed clinical and epidemiologic and  
11 outcome data from SARS-CoV-2-PCR-positive patients in our healthcare system.

12 **Methods:** From 03/13/202 onward, demographics, comorbidities, outpatient medications, along  
13 with 75 laboratory, 2 imaging, 19 therapeutic, and 4 outcome-related parameters were manually  
14 extracted from the electronic medical record of SARS-CoV-2 positive patients. These parameters  
15 were entered on a registry featuring calculation, graphing tools, pivot tables, and a macro  
16 programming language. Initially, two internal medicine residents populated the database, then  
17 professional data abstractors populated the registry. When the National Center for Immunization  
18 and Respiratory Diseases released their COVID-19 case report form for public access, we  
19 adapted it and used it on a browser-based, metadata-driven electronic data capture software  
20 platform. Statistics were performed in R and Minitab.

## 21 **Results:**

22 At the time of this submission, 200,807 SARS-CoV-2 RT-PCR tests were performed on 107,604  
23 distinct patients. 3699 (3.4%) of those have had positive results. Of those, 399 (11%) have had  
24 the more than 75 parameters full entered in the registry. The average follow-up period was 25  
25 days (range 21-34 days). Age, male gender, diabetes, hypertension, cardiovascular disease,  
26 kidney disease, and cancer were associated with hospital admission (all p values < 0.01), but not  
27 ICU admission. Statin, ACEI-ARB, and acid suppressant use were associated with admission (all  
28 p values < 0.03). Obesity and history of autoimmune disease were not associated with need for  
29 admission. Supplemental oxygen, vasopressor requirement, and outpatient statin use were  
30 associated with increased mortality (all p values < 0.03).

## 31 **Conclusion:**

32 A living COVID-19 registry represents a mechanism to facilitate optimal sharing of data  
33 between providers, consumers, health information networks, and health plans through  
34 technology-enabled, secure-access electronic health information. Our approach also involves a  
35 diversity of new roles in the field, such as using residents, staff, and the quality department, in  
36 addition to professional data extractors and the health informatics team.

37 However, due to the overwhelming number of infections that continues to accelerate, and  
38 the labor/time intense nature of the project, only 11% of all patients with COVID-19 had all  
39 parameters entered in the registry. Therefore, this report also offers lessons learned and discusses  
40 sustainability issues, should others wish to establish a registry. It also highlights the local and  
41 broader public health significance of the registry.

42 **Background:**

43 One dilemma in the attempt to deliver state-of-the-art therapeutics or understand  
44 emerging novel infectious pathogens is that the most current data is not always rapidly accessible  
45 to clinicians as soon as it becomes available. Hence, living systematic reviews have arisen as a  
46 potential solution to narrow the gap between evidence and practice.<sup>1,2</sup>

47 Along the same lines, having live access with continuous updates of a patient data base  
48 using a standardized, well designed format and a user friendly, interactive software which allows  
49 us to also to more rapidly hypothesis test or identify patterns relevant to prevention motivated  
50 this effort. Additionally, data from one country or U.S. locality may not be generalizable to  
51 others, and data and experience from non-university or rural settings may be underrepresented in  
52 the medial literature, or not covered by media.<sup>3</sup> Furthermore, rural areas are currently  
53 experiencing some of the biggest increases in new SARS-CoV-2 infections. Fourth, on June 19,  
54 2020, the National Academies of Sciences, Engineering, and Medicine hosted a public meeting  
55 on “Data Needs to Monitor the Evolution of SARS-CoV-2”. Presenters agreed that regional  
56 surveillance nodes were needed. Last, the recently described “tragic data gap”, and the federal  
57 curtailment of reporting COVID-19 data to the national Health Safety Network, also provided  
58 motivation for this intervention.<sup>4</sup> In the current climate, archiving detailed patient data in  
59 retrievable, easily analyzable, and share-friendly formats has become crucial for informing  
60 responses to current and future pandemics.<sup>4</sup>

61 Recent guidance<sup>5</sup> and events<sup>6,7</sup> also underscore the added value having private,  
62 nongovernmental alternatives for collecting and analyzing large scale epidemiologic data.

63

64 We sought to implement an adaptive, ‘living’ registry capable of capturing detailed  
65 epidemiologic and clinical information from every patient diagnosed with SARS-CoV-2  
66 infection, similar to and more granular than the Danish COVID-19 Cohort or TriNetX network.  
67 Examples of the living approach include the living rapid reviews in the Annals of Internal  
68 Medicine, and the living systematic review of the University of Toronto regarding secondary  
69 infections in patients with COVID-19. However, these are literature reviews and not registries.

70 Our ultimate goal is to have a minable source of detailed information updated on an  
71 ongoing basis, with minimal human effort, and linkable to SARS-CoV-2 whole genome  
72 sequences, and other registries across the United States. Perhaps, becoming one of many extra-  
73 governmental surveillance nodes in a regional or national network.

#### 74 **Methods:**

75 The healthcare system consists of five acute care hospitals (ACH) and six long- term care  
76 facilities (LCTF) totaling 1056 ACH and 800 LCTF beds. It spans eleven suburban, rural and  
77 urban counties in the Finger-Lakes Region of NY. The first iteration of the registry was  
78 completed on 04/11/2020. Collection dates ranged from the first patient diagnosed w/ SAR-  
79 COV-2 on 03/13/2020 to the present.

80 In mid-March 2020, after the first case in our community, demographics, comorbidities,  
81 outpatient medications, along with 75 laboratory, 2 imaging, 19 therapeutic, and 4 outcome-  
82 related parameters were manually extracted from the electronic medical record of SARS-CoV-2  
83 positive patients. These parameters were entered on a registry featuring calculation, graphing  
84 tools, pivot tables, and a macro programming language. Initially, two internal medicine residents  
85 populated the database, then professional data abstractors populated the registry.

86 All patients in the above healthcare system who had a positive PCR for SARS-CoV-2  
87 from 03/13/2020 onward are included. At the time of this submission, 200,807 SARS-CoV-2  
88 RT-PCR tests were performed on 107,604 distinct patients. 3699 (3.4%) of those have had  
89 positive results. Of those, 399 (11%) have had the more than 75 parameters full entered in the  
90 registry. The average follow-up period was 25 days (range 21-34 days).

91 When the National Center for Immunization and Respiratory Diseases released their  
92 COVID-19 case report form (Last updated May 5th 2020, available at  
93 <https://www.cdc.gov/coronavirus/2019-ncov/php/reporting-pui.html>) for public access, we  
94 adapted it and used it on a browser-based, metadata-driven electronic data capture software  
95 platform.

96 Statistics were performed in R and Minitab.

## 97 **Results:**

98 Descriptive statistics are presented in Table 1, with mortality associations in Table 2.  
99 Age, male gender, diabetes, hypertension, cardiovascular disease, kidney disease, and cancer  
100 were associated with hospital admission, but not ICU admission. Statin, ACEI-ARB, and acid  
101 suppressant use were associated with admission as well. Obesity and history of autoimmune  
102 disease were not associated with need for admission. Supplemental oxygen and vasopressor and  
103 outpatient statin use were associated with increased mortality.

## 104 **Discussion:**

105 The registry revealed local patterns not apparent from less granular databased such as the  
106 CDC or county/state health departments, or from reports of other populations. For example, the  
107 average length of stay (LOS) for all admitted patients was 8 days (SD 8.6). The average LOS for

108 patients who did and did not require ICU-level care was 13.5 (SD 10.4) and 5.9 (SD 6.8),  
109 respectively. This is significant because remdesivir was not available during the follow up period  
110 for this initial cohort, and the LOS without it was already shorter than the 15-day outcome  
111 measure used in the final report.<sup>8</sup> Another example is a meta-analysis that found 5 studies, ACEI  
112 or ARB use was associated with a lower risk for severe illness. According to the authors, those  
113 results “do not provide enough evidence to draw conclusions about the potential efficacy of these  
114 medications in treating COVID-19”.<sup>2</sup> In contrast, we found use of angiotensin inhibitors and  
115 angiotensin receptor blockers was higher in admitted vs. ED treated-and-released patients ( $p \leq$   
116 0.001). A third example involves a Chinese report which showed that statin treatment was  
117 associated with lower mortality.<sup>9</sup> However in our population, statin use was higher in admitted  
118 patients compared to patients who did not require admission (all  $p \leq 0.001$ ). Statin use was also  
119 higher in those who died than those who survived (Table 2) Last, in New York City, viral load  
120 was correlated with risk of intubation, but in our more rural and suburban area, we observed that  
121 viral load did not correlate with severity of illness.<sup>10, 11</sup>

122 Registry challenges, pitfalls, and threats to sustainability are presented in Table 3.  
123 Manual data extraction into the original spreadsheet became prohibitively labor intensive and  
124 analytically unmanageable as the number of new cases rapidly increased. Real-time abstraction  
125 needed to be suspended for several weeks while contents were transferred to the metadata-driven  
126 electronic data capture software platform. As of 06/14/2020, registry personnel were able to  
127 manually populate all the parameters mentioned above from 11% (399) of the patients who  
128 tested positive (236 ambulatory, 163 inpatient). Mean follow up period for that group for the  
129 descriptive statistics presented below 25 days (range 21-34 days).

130 For diseases with lower incidence rates, the sustainability of the initial approach would  
131 have been be achievable, but the approach became unsustainable given epidemic/pandemic-level  
132 volumes of new cases daily and weekly. For optimal sustainability, 2 full time experienced data  
133 extractors, automation and machine-based learning would be required.

134 **Conclusion:**

135 A living COVID-19 registry represents a mechanism to facilitate optimal sharing of data  
136 between providers, consumers, health information networks, and health plans through  
137 technology-enabled, secure-access electronic health information. Our approach also involves a  
138 diversity of new roles in the field such as using residents, staff, and the quality department, in  
139 addition to professional data extractors and the health informatics team.

140 However, due to the overwhelming number of infections that continues to accelerate,  
141 and the labor/time intense nature of the project, only 11% of all patients with COVID-19 had all  
142 parameters entered in the registry. Therefore, this report also offers lessons learned and discusses  
143 sustainability issues, should others wish to establish a registry. It also highlights the registry's  
144 local and broader public health significance.

145 The registry is well suited to address a range of hypothesis and is being leveraged by  
146 other researchers in our system. It provides a resource for researchers, policy makers, surge  
147 planning, and ultimately linking detailed clinical-demographic data to whole genome sequencing  
148 data for precision epidemiology. This approach has been successfully used to improve outcomes  
149 for drug-resistant bacteria.<sup>12</sup> Last, once established, the informatics algorithms and parameters  
150 can be applied to patients infected with any high-consequence or novel pathogen.

151

152 **References:**

- 153 1. Elliott JH, Turner T, Clavisi O, et al. Living systematic reviews: an emerging  
154 opportunity to narrow the evidence-practice gap. *PLoS Med.* 2014;11:e1001603.
- 155 2. Mackey K, King VJ, Gurley S, et al. Risks and impact of angiotensin-converting  
156 enzyme inhibitors or angiotensin-receptor blockers on SARS-CoV-2 infection in  
157 adults: a living systematic review. *Ann Intern Med.* 2020;173:195-203.
- 158 3. McMinn S, Stone W, Westwood R. As coronavirus cases surge, NPR examines  
159 hospital capacity. 2020. [https://www.npr.org/2020/07/28/896088067/as-coronavirus-](https://www.npr.org/2020/07/28/896088067/as-coronavirus-cases-surge-npr-examines-hospital-capacity)  
160 [cases-surge-npr-examines-hospital-capacity](https://www.npr.org/2020/07/28/896088067/as-coronavirus-cases-surge-npr-examines-hospital-capacity). Accessed 28 October 2020.
- 161 4. Schneider EC. Failing the test - the tragic data gap undermining the U.S. pandemic  
162 response. *N Engl J Med.* 2020;383:299-302.
- 163 5. Health and Human Services. COVID-19 guidance for hospital reporting and FAQs  
164 for hospitals, hospital laboratory, and acute care facility data reporting updated July  
165 29, 2020. 2020. [https://www.hhs.gov/sites/default/files/covid-19-faqs-hospitals-](https://www.hhs.gov/sites/default/files/covid-19-faqs-hospitals-hospital-laboratory-acute-care-facility-data-reporting.pdf)  
166 [hospital-laboratory-acute-care-facility-data-reporting.pdf](https://www.hhs.gov/sites/default/files/covid-19-faqs-hospitals-hospital-laboratory-acute-care-facility-data-reporting.pdf). Accessed 28 October  
167 2020.
- 168 6. Wamsley L. Fired Florida data scientist launches a coronavirus dashboard of her own.  
169 2020. [https://www.npr.org/2020/06/14/876584284/fired-florida-data-scientist-](https://www.npr.org/2020/06/14/876584284/fired-florida-data-scientist-launches-a-coronavirus-dashboard-of-her-own)  
170 [launches-a-coronavirus-dashboard-of-her-own](https://www.npr.org/2020/06/14/876584284/fired-florida-data-scientist-launches-a-coronavirus-dashboard-of-her-own). Accessed 28 October 2020.
- 171 7. Huang P, Simmons-Duffin S. White House strips CDC of data collection role for  
172 COVID-19 hospitalizations. 2020. [https://www.npr.org/sections/health-](https://www.npr.org/sections/health-shots/2020/07/15/891351706/white-house-strips-cdc-of-data-collection-role-for-covid-19-hospitalizations)  
173 [shots/2020/07/15/891351706/white-house-strips-cdc-of-data-collection-role-for-](https://www.npr.org/sections/health-shots/2020/07/15/891351706/white-house-strips-cdc-of-data-collection-role-for-covid-19-hospitalizations)  
174 [covid-19-hospitalizations](https://www.npr.org/sections/health-shots/2020/07/15/891351706/white-house-strips-cdc-of-data-collection-role-for-covid-19-hospitalizations). Accessed 28 October 2020.

- 175 8. Beigel JH, Tomashek KM, Dodd LE, et al. Remdesivir for the treatment of Covid-19  
176 - final report N Engl J Med. 2020; doi:10.1056/NEJMoa2007764.
- 177 9. Zhang XJ, Qin JJ, Cheng X, et al. In-hospital use of statins is associated with a  
178 reduced risk of mortality among individuals with COVID-19. Cell Metab.  
179 2020;32:176-187.
- 180 10. Lesho E, Reno L, Newhart D, et al. Temporal, spatial, and epidemiologic  
181 relationships of Severe Acute Respiratory Syndrome Coronavirus 2 (SARS-CoV-2)  
182 gene cycle thresholds: a pragmatic ambi-directional. Clin Infect Dis. 2020;  
183 doi:10.1093/cid/ciaa1248.
- 184 11. Magleby R, Westblade LF, Trzebucki A, et al. Impact of SARS-CoV-2 viral load on  
185 risk of intubation and mortality among hospitalized patients with Coronavirus Disease  
186 2019. Clin Infect Dis. 2020; doi:10.1093/cid/ciaa851.
- 187 12. Lesho EP, Waterman PE, Chukwuma U, et al. The antimicrobial resistance  
188 monitoring and research (ARMoR) program: the US Department of Defense response  
189 to escalating antimicrobial resistance. Clin Infect Dis. 2014;59:390-7.

190

191

192

193

194

195



196 Table 1: Descriptive Statistics, Outpatient vs. Inpatient (ICU vs. non-ICU)

197

|                                 | Total (n=180)                                                                                             | Outpatient (n=92)                                                  | Inpatient (n=88)                                                    |                                                    | p-value    |
|---------------------------------|-----------------------------------------------------------------------------------------------------------|--------------------------------------------------------------------|---------------------------------------------------------------------|----------------------------------------------------|------------|
|                                 |                                                                                                           |                                                                    | ICU (n=35)                                                          | Non-ICU (n=53)                                     |            |
| <b>Demographics</b>             |                                                                                                           |                                                                    |                                                                     |                                                    |            |
| Age                             | 55.0 (37.8, 68.0)                                                                                         | 45.5 (30.8,58.0)                                                   | 62.5 (52.0, 73.0)                                                   |                                                    | <0.0001 ** |
|                                 |                                                                                                           |                                                                    | 66.0 (55.0, 74.0)                                                   | 61.0 (50.0, 73.0)                                  | 0.33       |
| Male Gender                     | 87 (48%)                                                                                                  | 34/92 (37%)                                                        | 53/88 (60%)                                                         |                                                    | 0.003 **   |
|                                 |                                                                                                           |                                                                    | 24 (69%)                                                            | 29 (55%)                                           | 0.28       |
| Race                            | Black 40/163 (25%)<br>White 97/163 (60%)<br>Hispanic 18/163 (11%)<br>Asian 1/163 (1%)<br>Other 7/163 (4%) | 23/75 (31%)<br>42/75 (56%)<br>8/75 (11%)<br>0/75 (0%)<br>2/75 (3%) | 17/88 (19%)<br>55/88 (63%)<br>10/88 (11%)<br>1/88 (1%)<br>5/88 (6%) |                                                    | 0.31       |
|                                 |                                                                                                           |                                                                    | 9 (26%)<br>23 (66%)<br>2 (6%)<br>1 (3%)<br>0 (0%)                   | 8 (15%)<br>32 (60%)<br>8 (15%)<br>0 (0%)<br>5 (9%) | 0.27       |
| BMI                             | 30.7 (26.3,37.8)                                                                                          | 30.9 (25.6,37.2)                                                   | 30.4 (27.2,38.3)                                                    |                                                    | 0.43       |
|                                 |                                                                                                           |                                                                    | 31.2 (27.2, 38.6)                                                   | 30.0 (27.1, 37.9)                                  | 0.78       |
| Current Smoker                  | 11/160 (7%)                                                                                               | 5/87 (6%)                                                          | 6/87 (7%)                                                           |                                                    | 1.00       |
|                                 |                                                                                                           |                                                                    | 3 (9%)                                                              | 3/52 (6%)                                          | 0.68       |
| Current or Former Smoker        | 73/160 (46%)                                                                                              | 30/73 (41%)                                                        | 43/87 (49%)                                                         |                                                    | 0.37       |
|                                 |                                                                                                           |                                                                    | 18 (51%)                                                            | 23/52 (44%)                                        | 0.34       |
| Health Care Worker              | 38/169 (22%)                                                                                              | 27/81 (33%)                                                        | 11/88 (13%)                                                         |                                                    | 0.002 **   |
|                                 |                                                                                                           |                                                                    | 4 (11%)                                                             | 7 (13%)                                            | 1.00       |
| <b>Comorbidities</b>            |                                                                                                           |                                                                    |                                                                     |                                                    |            |
| Morbid Obesity                  | 24/179 (13%)                                                                                              | 8/91 (9%)                                                          | 16 (18%)                                                            |                                                    | 0.10       |
|                                 |                                                                                                           |                                                                    | 6 (17%)                                                             | 10 (19%)                                           | 1.00       |
| Chronic Resp Dz                 | 36/179 (20%)                                                                                              | 13/91 (14%)                                                        | 23 (26%)                                                            |                                                    | 0.07       |
|                                 |                                                                                                           |                                                                    | 7 (20%)                                                             | 16 (30%)                                           | 0.41       |
| CKD/ESRD                        | 20/179 (11%)                                                                                              | 6/81 (7%)                                                          | 14 (16%)                                                            |                                                    | 0.06       |
|                                 |                                                                                                           |                                                                    | 9 (26%)                                                             | 5 (9%)                                             | 0.07       |
| HTN                             | 83/179 (46%)                                                                                              | 27/91 (30%)                                                        | 56 (64%)                                                            |                                                    | <0.0001 ** |
|                                 |                                                                                                           |                                                                    | 23 (66%)                                                            | 33 (62%)                                           | 0.92       |
| DM                              | 49/179 (27%)                                                                                              | 15/91 (16%)                                                        | 34 (39%)                                                            |                                                    | 0.002 **   |
|                                 |                                                                                                           |                                                                    | 19 (54%)                                                            | 15 (28%)                                           | 0.08       |
| Cardiovascular Dx               | 44/179 (25%)                                                                                              | 11/91 (12%)                                                        | 33 (38%)                                                            |                                                    | 0.0002 **  |
|                                 |                                                                                                           |                                                                    | 14 (40%)                                                            | 19 (36%)                                           | 0.43       |
| Cancer Dx                       | 6/179 (3%)                                                                                                | 0/91 (0%)                                                          | 6/88 (7%)                                                           |                                                    | 0.01 *     |
|                                 |                                                                                                           |                                                                    | 4 (11%)                                                             | 2 (4%)                                             | 0.21       |
| Autoimmune Dx                   | 4/179 (2%)                                                                                                | 2/91 (2%)                                                          | 2 (2%)                                                              |                                                    | 1.00       |
|                                 |                                                                                                           |                                                                    | 2 (6%)                                                              | 0 (0%)                                             | 0.16       |
| Liver disease Dx                | 4/179 (2%)                                                                                                | 0/91 (0%)                                                          | 4/88 (5%)                                                           |                                                    | 0.06       |
|                                 |                                                                                                           |                                                                    | 3 (9%)                                                              | 1 (2%)                                             | 0.30       |
| <b>Medications</b>              |                                                                                                           |                                                                    |                                                                     |                                                    |            |
| ACE/ARB use                     | 39/179 (22%)                                                                                              | 12 (13%)                                                           | 27/87 (31%)                                                         |                                                    | 0.006 **   |
|                                 |                                                                                                           |                                                                    | 15/34 (44%)                                                         | 12 (23%)                                           | 0.06       |
| Acid suppression medication use | 61/179 (34%)                                                                                              | 23 (25%)                                                           | 38/87 (44%)                                                         |                                                    | 0.01 *     |
|                                 |                                                                                                           |                                                                    | 18/34 (53%)                                                         | 20 (38%)                                           | 0.24       |
| Statin use                      | 55/179 (31%)                                                                                              | 16 (18%)                                                           | 39/87 (45%)                                                         |                                                    | 0.0001 **  |

|                                                       |                   |                |                    |                   |           |
|-------------------------------------------------------|-------------------|----------------|--------------------|-------------------|-----------|
|                                                       |                   |                | 18/34 (53%)        | 21 (40%)          | 0.32      |
| <b>Sick Contact</b>                                   |                   |                |                    |                   |           |
| COVID Contact                                         | 44/166 (27%)      | 22/80 (28%)    | 22/86 (26%)        |                   | 0.92      |
|                                                       |                   |                | 4/34 (12%)         | 18/52 (35%)       | 0.03 *    |
| Sick Contact                                          | 86/159 (54%)      | 42/74 (57%)    | 44/85 (52%)        |                   | 0.63      |
|                                                       |                   |                | 16 (46%)           | 28/50 (56%)       | 0.48      |
| <b>Time from Symptoms to first presentation(days)</b> | 5.0 (3.0, 9.5)    | 5.0 (3.0, 9.0) | 5.0 (3.0, 9.3)     |                   | 0.91      |
|                                                       |                   |                | 4.0 (2.0, 7.0)     | 6.0 (3.0, 10.0)   | 0.04 *    |
| <b>Labs</b>                                           |                   |                |                    |                   |           |
| WBC                                                   | 6.0 (4.7, 7.8)    | 5.9 (4.5,7.8)  | 6.1 (4.8,7.9)      |                   | 0.28      |
|                                                       |                   |                | 6.8 (4.9, 7.7)     | 5.9 (4.7,8.0)     | 0.55      |
| Lymphocytes                                           | 1.0 (0.7, 1.4)    | 1.1 (0.8, 1.5) | 1.0 (0.6, 1.3)     |                   | 0.18      |
|                                                       |                   |                | 0.9 (0.6, 1.4)     | 1.1 (0.7, 1.3)    | 0.68      |
| ANC                                                   | 4.1 (3.1, 6.0)    | 3.7 (2.6,4.7)  | 4.2 (3.5, 6.3)     |                   | 0.08      |
|                                                       |                   |                | 4.9 (3.7, 6.5)     | 4.1 (3.2, 5.8)    | 0.33      |
| D-Dimer                                               | 826 (601, 1418)   | Only 2 values  | 889 (634, 1439)    |                   | XXXXXX    |
|                                                       |                   |                | 831 (642,1349)     | 946 (631, 1450)   | 1.00      |
| LDH                                                   | 302 (261, 399)    | Only 1 value   | 336 (266, 399)     |                   | XXXXXX    |
|                                                       |                   |                | 362 (323,462)      | 293 (254, 389)    | 0.11      |
| Procalcitonin                                         | 0.12 (0.06, 0.19) | No values      | 0.12 (0.06, 0.19)  |                   | XXXXXX    |
|                                                       |                   |                | 0.10 (0.06, 0.21)  | 0.12 (0.07, 0.19) | 0.62      |
| CRP                                                   | 51 (28, 119)      | Only 1 value   | 52.5 (29.2, 119.2) |                   | XXXXXX    |
|                                                       |                   |                | 121 (44,135)       | 51 (22,102)       | 0.07      |
| CK                                                    | 97 (69,204)       | No values      | 97 (69, 204)       |                   | XXXXXX    |
|                                                       |                   |                | 71 (60, 110)       | 112 (74, 204)     | 0.31      |
| <b>Imaging</b>                                        |                   |                |                    |                   |           |
| Presentation CXR positive                             | 59/112 (53%)      | 7/26 (27%)     | 52/86 (60%)        |                   | 0.005 **  |
|                                                       |                   |                | 22 (63%)           | 30/51 (59%)       | 0.88      |
| Presentation CT positive                              | 19/22 (86%)       | 0/3 (0%)       | 19/19 (100%)       |                   | 0.0006 ** |
|                                                       |                   |                | 8/8 (100%)         | 11/11 (100%)      | 1.00      |

198

199

200

201

202

203

204

205

206 Table 2: Chi Square Test for Associations with Morality

| Medication            | No Died | Yes Died | No D/C | Yes D/C | P value |
|-----------------------|---------|----------|--------|---------|---------|
| Hydroxychloroquine    | 13      | 10       | 74     | 35      | 0.296   |
| Kaletra               | 22      | 2        | 105    | 4       | 0.319   |
| Anti IL-6             | 23      | 1        | 108    | 1       | 0.236   |
| Pressor Support       | 13      | 11       | 100    | 9       | 0.001   |
| Non- inhaled Steroids | 17      | 7        | 91     | 17      | 0.123   |
| Supplemental O2       | 5       | 19       | 48     | 60      | 0.033   |
| HFNC                  | 18      | 6        | 96     | 12      | 0.073   |
| Vit D Home            | 11      | 8        | 74     | 33      | 0.334   |
| Statin Home           | 6       | 14       | 66     | 42      | 0.010   |

207

|                | No Died | No D/C | ACE Died | ACE D/C | ARB Died | ARB D/C | Both Died | Both D/C | P value |
|----------------|---------|--------|----------|---------|----------|---------|-----------|----------|---------|
| <b>ACE/ARB</b> | 10      | 73     | 3        | 22      | 4        | 12      | 0         | 6        | 0.391   |

208

|                        | No Died | No D/C | PPI Died | PPI D/C | H2B Died | H2B D/C | P Value |
|------------------------|---------|--------|----------|---------|----------|---------|---------|
| <b>Home Suppressor</b> | 7       | 66     | 11       | 31      | 1        | 6       | 0.061   |

209

210

211 Factors associated with morality from 399 COVID-19 patents in Western New York from March  
 212 15, 2020 to April 15, 2020

213

214

215

216 Table 3: Considerations and Lessons Learned for Creating Registries

|                                                                                                                                                                                                                                                                        |
|------------------------------------------------------------------------------------------------------------------------------------------------------------------------------------------------------------------------------------------------------------------------|
| Exploratory registries generally enable broader and more comprehensive data capture than objective registries, but the trade-off is manageability and time required.                                                                                                   |
| Initial data points should be extrapolated from existing knowledge on similar medical conditions to determine objective points, even if the overall nature of the registry is exploratory.                                                                             |
| The registry needs agility to be able to manage evolving or changing parameters as the pandemic continues.                                                                                                                                                             |
| Manual data extraction requires at least 0.25-0.5 hours per chart for clinicians with health informatics familiarity, and 0.5-0.75 hours per chart for professional data extractors with limited clinical experience. For inexperienced user, it can take much longer. |
| For optimal sustainability, software compatible with the electronic medical record, automatic data extraction, and machine-based learning are needed.                                                                                                                  |
| Extracting information from subjective documentation may lead to measurement bias.                                                                                                                                                                                     |
| Data points with binary (yes/no) answers, or with numerical mapping (1=CHF, 2=DM, 3=CKD etc.) are more amenable statistical analysis; free text data entry should be reduced.                                                                                          |
| The number of parameters or data fields increases labor requirements and decreases manageability, but broadens the range and number of hypotheses that can be tested. Similarly, as the number of abstractors increases, so does inter-observer variability.           |
| Serial or consecutive values of a data point will not be consistently obtained unless there a systematic or research protocol in place.                                                                                                                                |
| The platform on which the registry is created should provide data visualization tools in an                                                                                                                                                                            |

|                                                                                                                      |
|----------------------------------------------------------------------------------------------------------------------|
| interactive form.                                                                                                    |
| Collaboration between multiple health systems with other patient populations increases generalizability of findings. |
| Clinicians need protected time to analyze data.                                                                      |
